# Supplementary material
Source: publisher figshare collection journal article supplement (https://gsajournals.figshare.com/ndownloader/files/28223019)
Supplement: Supplementary file 1 [file 28223019]

## Sheet: Sheet1
Sample Name	Tetrad set	Category	Library type	Genotype and other details
tetp1_B2	1	"tetrad spores"	Clonal	YAN463 x yGIL646 F1 progeny
tetp1_A2	1	"tetrad spores"	Clonal	YAN463 x yGIL646 F1 progeny
tetp1_D2	1	"tetrad spores"	Clonal	YAN463 x yGIL646 F1 progeny
tetp1_C2	1	"tetrad spores"	Clonal	YAN463 x yGIL646 F1 progeny
tetp1_H2	2	"tetrad spores"	Clonal	YAN463 x yGIL646 F1 progeny
tetp1_G2	2	"tetrad spores"	Clonal	YAN463 x yGIL646 F1 progeny
tetp1_F2	2	"tetrad spores"	Clonal	YAN463 x yGIL646 F1 progeny
tetp1_E2	2	"tetrad spores"	Clonal	YAN463 x yGIL646 F1 progeny
tetp1_B3	3	"tetrad spores"	Clonal	YAN463 x yGIL646 F1 progeny
tetp1_A3	3	"tetrad spores"	Clonal	YAN463 x yGIL646 F1 progeny
tetp1_D3	3	"tetrad spores"	Clonal	YAN463 x yGIL646 F1 progeny
tetp1_C3	3	"tetrad spores"	Clonal	YAN463 x yGIL646 F1 progeny
tetp1_H3	4	"tetrad spores"	Clonal	YAN463 x yGIL646 F1 progeny
tetp1_G3	4	"tetrad spores"	Clonal	YAN463 x yGIL646 F1 progeny
tetp1_F3	4	"tetrad spores"	Clonal	YAN463 x yGIL646 F1 progeny
tetp1_E3	4	"tetrad spores"	Clonal	YAN463 x yGIL646 F1 progeny
tetp1_B4	5	"tetrad spores"	Clonal	YAN463 x yGIL646 F1 progeny
tetp1_A4	5	"tetrad spores"	Clonal	YAN463 x yGIL646 F1 progeny
tetp1_D4	5	"tetrad spores"	Clonal	YAN463 x yGIL646 F1 progeny
tetp1_C4	5	"tetrad spores"	Clonal	YAN463 x yGIL646 F1 progeny
tetp1_H4	6	"tetrad spores"	Clonal	YAN463 x yGIL646 F1 progeny
tetp1_G4	6	"tetrad spores"	Clonal	YAN463 x yGIL646 F1 progeny
tetp1_F4	6	"tetrad spores"	Clonal	YAN463 x yGIL646 F1 progeny
tetp1_E4	6	"tetrad spores"	Clonal	YAN463 x yGIL646 F1 progeny
tetp1_A5	7	"tetrad spores"	Clonal	YAN463 x yGIL646 F1 progeny
tetp1_D5	7	"tetrad spores"	Clonal	YAN463 x yGIL646 F1 progeny
tetp1_C5	7	"tetrad spores"	Clonal	YAN463 x yGIL646 F1 progeny
tetp1_B5	7	"tetrad spores"	Clonal	YAN463 x yGIL646 F1 progeny
tetp1_H5	8	"tetrad spores"	Clonal	YAN463 x yGIL646 F1 progeny
tetp1_G5	8	"tetrad spores"	Clonal	YAN463 x yGIL646 F1 progeny
tetp1_F5	8	"tetrad spores"	Clonal	YAN463 x yGIL646 F1 progeny
tetp1_E5	8	"tetrad spores"	Clonal	YAN463 x yGIL646 F1 progeny
tetp1_A6	9	"tetrad spores"	Clonal	YAN463 x yGIL646 F1 progeny
tetp1_D6	9	"tetrad spores"	Clonal	YAN463 x yGIL646 F1 progeny
tetp1_C6	9	"tetrad spores"	Clonal	YAN463 x yGIL646 F1 progeny
tetp1_B6	9	"tetrad spores"	Clonal	YAN463 x yGIL646 F1 progeny
tetp1_A7	10	"tetrad spores"	Clonal	YAN463 x yGIL646 F1 progeny
tetp1_D7	10	"tetrad spores"	Clonal	YAN463 x yGIL646 F1 progeny
tetp1_C7	10	"tetrad spores"	Clonal	YAN463 x yGIL646 F1 progeny
tetp1_B7	10	"tetrad spores"	Clonal	YAN463 x yGIL646 F1 progeny
tetp1_H7	11	"tetrad spores"	Clonal	YAN463 x yGIL646 F1 progeny
tetp1_G7	11	"tetrad spores"	Clonal	YAN463 x yGIL646 F1 progeny
tetp1_F7	11	"tetrad spores"	Clonal	YAN463 x yGIL646 F1 progeny
tetp1_E7	11	"tetrad spores"	Clonal	YAN463 x yGIL646 F1 progeny
tetp1_A8	12	"tetrad spores"	Clonal	YAN463 x yGIL646 F1 progeny
tetp1_D8	12	"tetrad spores"	Clonal	YAN463 x yGIL646 F1 progeny
tetp1_C8	12	"tetrad spores"	Clonal	YAN463 x yGIL646 F1 progeny
tetp1_B8	12	"tetrad spores"	Clonal	YAN463 x yGIL646 F1 progeny
tetp1_H8	13	"tetrad spores"	Clonal	YAN463 x yGIL646 F1 progeny
tetp1_G8	13	"tetrad spores"	Clonal	YAN463 x yGIL646 F1 progeny
tetp1_F8	13	"tetrad spores"	Clonal	YAN463 x yGIL646 F1 progeny
tetp1_E8	13	"tetrad spores"	Clonal	YAN463 x yGIL646 F1 progeny
tetp1_A9	14	"tetrad spores"	Clonal	YAN463 x yGIL646 F1 progeny
tetp1_D9	14	"tetrad spores"	Clonal	YAN463 x yGIL646 F1 progeny
tetp1_C9	14	"tetrad spores"	Clonal	YAN463 x yGIL646 F1 progeny
tetp1_B9	14	"tetrad spores"	Clonal	YAN463 x yGIL646 F1 progeny
tetp1_H9	15	"tetrad spores"	Clonal	YAN463 x yGIL646 F1 progeny
tetp1_G9	15	"tetrad spores"	Clonal	YAN463 x yGIL646 F1 progeny
tetp1_F9	15	"tetrad spores"	Clonal	YAN463 x yGIL646 F1 progeny
tetp1_E9	15	"tetrad spores"	Clonal	YAN463 x yGIL646 F1 progeny
tetp1_B10	16	"tetrad spores"	Clonal	YAN463 x yGIL646 F1 progeny
tetp1_A10	16	"tetrad spores"	Clonal	YAN463 x yGIL646 F1 progeny
tetp1_D10	16	"tetrad spores"	Clonal	YAN463 x yGIL646 F1 progeny
tetp1_C10	16	"tetrad spores"	Clonal	YAN463 x yGIL646 F1 progeny
tetp1_H10	17	"tetrad spores"	Clonal	YAN463 x yGIL646 F1 progeny
tetp1_G10	17	"tetrad spores"	Clonal	YAN463 x yGIL646 F1 progeny
tetp1_F10	17	"tetrad spores"	Clonal	YAN463 x yGIL646 F1 progeny
tetp1_E10	17	"tetrad spores"	Clonal	YAN463 x yGIL646 F1 progeny
tetp1_B11	18	"tetrad spores"	Clonal	YAN463 x yGIL646 F1 progeny
tetp1_A11	18	"tetrad spores"	Clonal	YAN463 x yGIL646 F1 progeny
tetp1_D11	18	"tetrad spores"	Clonal	YAN463 x yGIL646 F1 progeny
tetp1_C11	18	"tetrad spores"	Clonal	YAN463 x yGIL646 F1 progeny
tetp1_H11	19	"tetrad spores"	Clonal	YAN463 x yGIL646 F1 progeny
tetp1_G11	19	"tetrad spores"	Clonal	YAN463 x yGIL646 F1 progeny
tetp1_F11	19	"tetrad spores"	Clonal	YAN463 x yGIL646 F1 progeny
tetp1_E11	19	"tetrad spores"	Clonal	YAN463 x yGIL646 F1 progeny
tetp1_B12	20	"tetrad spores"	Clonal	YAN463 x yGIL646 F1 progeny
tetp1_A12	20	"tetrad spores"	Clonal	YAN463 x yGIL646 F1 progeny
tetp1_C12	20	"tetrad spores"	Clonal	YAN463 x yGIL646 F1 progeny
tetp1_H12	21	"tetrad spores"	Clonal	YAN463 x yGIL646 F1 progeny
tetp1_G12	21	"tetrad spores"	Clonal	YAN463 x yGIL646 F1 progeny
tetp1_F12	21	"tetrad spores"	Clonal	YAN463 x yGIL646 F1 progeny
tetp1_E12	21	"tetrad spores"	Clonal	YAN463 x yGIL646 F1 progeny
tetp2_D1	22	"tetrad spores"	Clonal	YAN463 x yGIL646 F1 progeny
tetp2_C1	22	"tetrad spores"	Clonal	YAN463 x yGIL646 F1 progeny
tetp2_B1	22	"tetrad spores"	Clonal	YAN463 x yGIL646 F1 progeny
tetp2_A1	22	"tetrad spores"	Clonal	YAN463 x yGIL646 F1 progeny
tetp2_H1	23	"tetrad spores"	Clonal	YAN463 x yGIL646 F1 progeny
tetp2_G1	23	"tetrad spores"	Clonal	YAN463 x yGIL646 F1 progeny
tetp2_F1	23	"tetrad spores"	Clonal	YAN463 x yGIL646 F1 progeny
tetp2_E1	23	"tetrad spores"	Clonal	YAN463 x yGIL646 F1 progeny
tetp2_D3	24	"tetrad spores"	Clonal	YAN463 x yGIL646 F1 progeny
tetp2_C3	24	"tetrad spores"	Clonal	YAN463 x yGIL646 F1 progeny
tetp2_B3	24	"tetrad spores"	Clonal	YAN463 x yGIL646 F1 progeny
tetp2_A3	24	"tetrad spores"	Clonal	YAN463 x yGIL646 F1 progeny
tetp2_H3	25	"tetrad spores"	Clonal	YAN463 x yGIL646 F1 progeny
tetp2_G3	25	"tetrad spores"	Clonal	YAN463 x yGIL646 F1 progeny
tetp2_F3	25	"tetrad spores"	Clonal	YAN463 x yGIL646 F1 progeny
tetp2_E3	25	"tetrad spores"	Clonal	YAN463 x yGIL646 F1 progeny
tetp2_D4	26	"tetrad spores"	Clonal	YAN463 x yGIL646 F1 progeny
tetp2_C4	26	"tetrad spores"	Clonal	YAN463 x yGIL646 F1 progeny
tetp2_B4	26	"tetrad spores"	Clonal	YAN463 x yGIL646 F1 progeny
tetp2_A4	26	"tetrad spores"	Clonal	YAN463 x yGIL646 F1 progeny
tetp2_H4	27	"tetrad spores"	Clonal	YAN463 x yGIL646 F1 progeny
tetp2_G4	27	"tetrad spores"	Clonal	YAN463 x yGIL646 F1 progeny
tetp2_F4	27	"tetrad spores"	Clonal	YAN463 x yGIL646 F1 progeny
tetp2_E4	27	"tetrad spores"	Clonal	YAN463 x yGIL646 F1 progeny
tetp2_D5	28	"tetrad spores"	Clonal	YAN463 x yGIL646 F1 progeny
tetp2_C5	28	"tetrad spores"	Clonal	YAN463 x yGIL646 F1 progeny
tetp2_B5	28	"tetrad spores"	Clonal	YAN463 x yGIL646 F1 progeny
tetp2_A5	28	"tetrad spores"	Clonal	YAN463 x yGIL646 F1 progeny
tetp2_H5	29	"tetrad spores"	Clonal	YAN463 x yGIL646 F1 progeny
tetp2_G5	29	"tetrad spores"	Clonal	YAN463 x yGIL646 F1 progeny
tetp2_F5	29	"tetrad spores"	Clonal	YAN463 x yGIL646 F1 progeny
tetp2_E5	29	"tetrad spores"	Clonal	YAN463 x yGIL646 F1 progeny
tetp2_D6	30	"tetrad spores"	Clonal	YAN463 x yGIL646 F1 progeny
tetp2_C6	30	"tetrad spores"	Clonal	YAN463 x yGIL646 F1 progeny
tetp2_B6	30	"tetrad spores"	Clonal	YAN463 x yGIL646 F1 progeny
tetp2_A6	30	"tetrad spores"	Clonal	YAN463 x yGIL646 F1 progeny
tetp2_H6	31	"tetrad spores"	Clonal	YAN463 x yGIL646 F1 progeny
tetp2_G6	31	"tetrad spores"	Clonal	YAN463 x yGIL646 F1 progeny
tetp2_F6	31	"tetrad spores"	Clonal	YAN463 x yGIL646 F1 progeny
tetp2_E6	31	"tetrad spores"	Clonal	YAN463 x yGIL646 F1 progeny
tetp2_D7	32	"tetrad spores"	Clonal	YAN463 x yGIL646 F1 progeny
tetp2_C7	32	"tetrad spores"	Clonal	YAN463 x yGIL646 F1 progeny
tetp2_B7	32	"tetrad spores"	Clonal	YAN463 x yGIL646 F1 progeny
tetp2_A7	32	"tetrad spores"	Clonal	YAN463 x yGIL646 F1 progeny
tetp2_H7	33	"tetrad spores"	Clonal	YAN463 x yGIL646 F1 progeny
tetp2_G7	33	"tetrad spores"	Clonal	YAN463 x yGIL646 F1 progeny
tetp2_F7	33	"tetrad spores"	Clonal	YAN463 x yGIL646 F1 progeny
tetp2_E7	33	"tetrad spores"	Clonal	YAN463 x yGIL646 F1 progeny
tetp2_D8	34	"tetrad spores"	Clonal	YAN463 x yGIL646 F1 progeny
tetp2_C8	34	"tetrad spores"	Clonal	YAN463 x yGIL646 F1 progeny
tetp2_B8	34	"tetrad spores"	Clonal	YAN463 x yGIL646 F1 progeny
tetp2_A8	34	"tetrad spores"	Clonal	YAN463 x yGIL646 F1 progeny
tetp2_H8	35	"tetrad spores"	Clonal	YAN463 x yGIL646 F1 progeny
tetp2_G8	35	"tetrad spores"	Clonal	YAN463 x yGIL646 F1 progeny
tetp2_F8	35	"tetrad spores"	Clonal	YAN463 x yGIL646 F1 progeny
tetp2_E8	35	"tetrad spores"	Clonal	YAN463 x yGIL646 F1 progeny
tetp2_D9	36	"tetrad spores"	Clonal	YAN463 x yGIL646 F1 progeny
tetp2_C9	36	"tetrad spores"	Clonal	YAN463 x yGIL646 F1 progeny
tetp2_B9	36	"tetrad spores"	Clonal	YAN463 x yGIL646 F1 progeny
tetp2_A9	36	"tetrad spores"	Clonal	YAN463 x yGIL646 F1 progeny
tetp2_H9	37	"tetrad spores"	Clonal	YAN463 x yGIL646 F1 progeny
tetp2_G9	37	"tetrad spores"	Clonal	YAN463 x yGIL646 F1 progeny
tetp2_F9	37	"tetrad spores"	Clonal	YAN463 x yGIL646 F1 progeny
tetp2_E9	37	"tetrad spores"	Clonal	YAN463 x yGIL646 F1 progeny
tetp2_D10	38	"tetrad spores"	Clonal	YAN463 x yGIL646 F1 progeny
tetp2_C10	38	"tetrad spores"	Clonal	YAN463 x yGIL646 F1 progeny
tetp2_B10	38	"tetrad spores"	Clonal	YAN463 x yGIL646 F1 progeny
tetp2_A10	38	"tetrad spores"	Clonal	YAN463 x yGIL646 F1 progeny
tetp2_H10	39	"tetrad spores"	Clonal	YAN463 x yGIL646 F1 progeny
tetp2_G10	39	"tetrad spores"	Clonal	YAN463 x yGIL646 F1 progeny
tetp2_F10	39	"tetrad spores"	Clonal	YAN463 x yGIL646 F1 progeny
tetp2_E10	39	"tetrad spores"	Clonal	YAN463 x yGIL646 F1 progeny
tetp2_D11	40	"tetrad spores"	Clonal	YAN463 x yGIL646 F1 progeny
tetp2_C11	40	"tetrad spores"	Clonal	YAN463 x yGIL646 F1 progeny
tetp2_B11	40	"tetrad spores"	Clonal	YAN463 x yGIL646 F1 progeny
tetp2_A11	40	"tetrad spores"	Clonal	YAN463 x yGIL646 F1 progeny
tetp2_H11	41	"tetrad spores"	Clonal	YAN463 x yGIL646 F1 progeny
tetp2_G11	41	"tetrad spores"	Clonal	YAN463 x yGIL646 F1 progeny
tetp2_F11	41	"tetrad spores"	Clonal	YAN463 x yGIL646 F1 progeny
tetp2_E11	41	"tetrad spores"	Clonal	YAN463 x yGIL646 F1 progeny
tetp2_D12	42	"tetrad spores"	Clonal	YAN463 x yGIL646 F1 progeny
tetp2_C12	42	"tetrad spores"	Clonal	YAN463 x yGIL646 F1 progeny
tetp2_B12	42	"tetrad spores"	Clonal	YAN463 x yGIL646 F1 progeny
tetp2_A12	42	"tetrad spores"	Clonal	YAN463 x yGIL646 F1 progeny
tetp2_H12	43	"tetrad spores"	Clonal	YAN463 x yGIL646 F1 progeny
tetp2_G12	43	"tetrad spores"	Clonal	YAN463 x yGIL646 F1 progeny
tetp2_F12	43	"tetrad spores"	Clonal	YAN463 x yGIL646 F1 progeny
tetp2_E12	43	"tetrad spores"	Clonal	YAN463 x yGIL646 F1 progeny
tetp3_D1	44	"tetrad spores"	Clonal	YAN463 x yGIL646 F1 progeny
tetp3_C1	44	"tetrad spores"	Clonal	YAN463 x yGIL646 F1 progeny
tetp3_B1	44	"tetrad spores"	Clonal	YAN463 x yGIL646 F1 progeny
tetp3_A1	44	"tetrad spores"	Clonal	YAN463 x yGIL646 F1 progeny
tetp3_H1	45	"tetrad spores"	Clonal	YAN463 x yGIL646 F1 progeny
tetp3_G1	45	"tetrad spores"	Clonal	YAN463 x yGIL646 F1 progeny
tetp3_F1	45	"tetrad spores"	Clonal	YAN463 x yGIL646 F1 progeny
tetp3_E1	45	"tetrad spores"	Clonal	YAN463 x yGIL646 F1 progeny
tetp3_D2	46	"tetrad spores"	Clonal	YAN463 x yGIL646 F1 progeny
tetp3_C2	46	"tetrad spores"	Clonal	YAN463 x yGIL646 F1 progeny
tetp3_B2	46	"tetrad spores"	Clonal	YAN463 x yGIL646 F1 progeny
tetp3_A2	46	"tetrad spores"	Clonal	YAN463 x yGIL646 F1 progeny
tetp3_H2	47	"tetrad spores"	Clonal	YAN463 x yGIL646 F1 progeny
tetp3_G2	47	"tetrad spores"	Clonal	YAN463 x yGIL646 F1 progeny
tetp3_F2	47	"tetrad spores"	Clonal	YAN463 x yGIL646 F1 progeny
tetp3_E2	47	"tetrad spores"	Clonal	YAN463 x yGIL646 F1 progeny
tetp3_D4	48	"tetrad spores"	Clonal	YAN463 x yGIL646 F1 progeny
tetp3_C4	48	"tetrad spores"	Clonal	YAN463 x yGIL646 F1 progeny
tetp3_B4	48	"tetrad spores"	Clonal	YAN463 x yGIL646 F1 progeny
tetp3_A4	48	"tetrad spores"	Clonal	YAN463 x yGIL646 F1 progeny
tetp3_H4	49	"tetrad spores"	Clonal	YAN463 x yGIL646 F1 progeny
tetp3_G4	49	"tetrad spores"	Clonal	YAN463 x yGIL646 F1 progeny
tetp3_F4	49	"tetrad spores"	Clonal	YAN463 x yGIL646 F1 progeny
tetp3_E4	49	"tetrad spores"	Clonal	YAN463 x yGIL646 F1 progeny
tetp3_D5	50	"tetrad spores"	Clonal	YAN463 x yGIL646 F1 progeny
tetp3_C5	50	"tetrad spores"	Clonal	YAN463 x yGIL646 F1 progeny
tetp3_B5	50	"tetrad spores"	Clonal	YAN463 x yGIL646 F1 progeny
tetp3_A5	50	"tetrad spores"	Clonal	YAN463 x yGIL646 F1 progeny
tetp3_H5	51	"tetrad spores"	Clonal	YAN463 x yGIL646 F1 progeny
tetp3_G5	51	"tetrad spores"	Clonal	YAN463 x yGIL646 F1 progeny
tetp3_F5	51	"tetrad spores"	Clonal	YAN463 x yGIL646 F1 progeny
tetp3_E5	51	"tetrad spores"	Clonal	YAN463 x yGIL646 F1 progeny
tetp3_D6	52	"tetrad spores"	Clonal	YAN463 x yGIL646 F1 progeny
tetp3_C6	52	"tetrad spores"	Clonal	YAN463 x yGIL646 F1 progeny
tetp3_B6	52	"tetrad spores"	Clonal	YAN463 x yGIL646 F1 progeny
tetp3_A6	52	"tetrad spores"	Clonal	YAN463 x yGIL646 F1 progeny
tetp3_H6	53	"tetrad spores"	Clonal	YAN463 x yGIL646 F1 progeny
tetp3_G6	53	"tetrad spores"	Clonal	YAN463 x yGIL646 F1 progeny
tetp3_F6	53	"tetrad spores"	Clonal	YAN463 x yGIL646 F1 progeny
tetp3_E6	53	"tetrad spores"	Clonal	YAN463 x yGIL646 F1 progeny
tetp3_D7	54	"tetrad spores"	Clonal	YAN463 x yGIL646 F1 progeny
tetp3_C7	54	"tetrad spores"	Clonal	YAN463 x yGIL646 F1 progeny
tetp3_B7	54	"tetrad spores"	Clonal	YAN463 x yGIL646 F1 progeny
tetp3_A7	54	"tetrad spores"	Clonal	YAN463 x yGIL646 F1 progeny
tetp3_G7	55	"tetrad spores"	Clonal	YAN463 x yGIL646 F1 progeny
tetp3_F7	55	"tetrad spores"	Clonal	YAN463 x yGIL646 F1 progeny
tetp3_E7	55	"tetrad spores"	Clonal	YAN463 x yGIL646 F1 progeny
tetp3_H7	55	"tetrad spores"	Clonal	YAN463 x yGIL646 F1 progeny
tetp3_D8	56	"tetrad spores"	Clonal	YAN463 x yGIL646 F1 progeny
tetp3_C8	56	"tetrad spores"	Clonal	YAN463 x yGIL646 F1 progeny
tetp3_B8	56	"tetrad spores"	Clonal	YAN463 x yGIL646 F1 progeny
tetp3_A8	56	"tetrad spores"	Clonal	YAN463 x yGIL646 F1 progeny
tetp3_G8	57	"tetrad spores"	Clonal	YAN463 x yGIL646 F1 progeny
tetp3_F8	57	"tetrad spores"	Clonal	YAN463 x yGIL646 F1 progeny
tetp3_E8	57	"tetrad spores"	Clonal	YAN463 x yGIL646 F1 progeny
tetp3_H8	57	"tetrad spores"	Clonal	YAN463 x yGIL646 F1 progeny
tetp3_D9	58	"tetrad spores"	Clonal	YAN463 x yGIL646 F1 progeny
tetp3_C9	58	"tetrad spores"	Clonal	YAN463 x yGIL646 F1 progeny
tetp3_B9	58	"tetrad spores"	Clonal	YAN463 x yGIL646 F1 progeny
tetp3_A9	58	"tetrad spores"	Clonal	YAN463 x yGIL646 F1 progeny
tetp3_G9	59	"tetrad spores"	Clonal	YAN463 x yGIL646 F1 progeny
tetp3_F9	59	"tetrad spores"	Clonal	YAN463 x yGIL646 F1 progeny
tetp3_E9	59	"tetrad spores"	Clonal	YAN463 x yGIL646 F1 progeny
tetp3_H9	59	"tetrad spores"	Clonal	YAN463 x yGIL646 F1 progeny
tetp3_D10	60	"tetrad spores"	Clonal	YAN463 x yGIL646 F1 progeny
tetp3_C10	60	"tetrad spores"	Clonal	YAN463 x yGIL646 F1 progeny
tetp3_B10	60	"tetrad spores"	Clonal	YAN463 x yGIL646 F1 progeny
tetp3_A10	60	"tetrad spores"	Clonal	YAN463 x yGIL646 F1 progeny
tetp3_H10	61	"tetrad spores"	Clonal	YAN463 x yGIL646 F1 progeny
tetp3_G10	61	"tetrad spores"	Clonal	YAN463 x yGIL646 F1 progeny
tetp3_F10	61	"tetrad spores"	Clonal	YAN463 x yGIL646 F1 progeny
tetp3_E10	61	"tetrad spores"	Clonal	YAN463 x yGIL646 F1 progeny
tetp3_D11	62	"tetrad spores"	Clonal	YAN463 x yGIL646 F1 progeny
tetp3_C11	62	"tetrad spores"	Clonal	YAN463 x yGIL646 F1 progeny
tetp3_B11	62	"tetrad spores"	Clonal	YAN463 x yGIL646 F1 progeny
tetp3_A11	62	"tetrad spores"	Clonal	YAN463 x yGIL646 F1 progeny
tetp3_H11	63	"tetrad spores"	Clonal	YAN463 x yGIL646 F1 progeny
tetp3_G11	63	"tetrad spores"	Clonal	YAN463 x yGIL646 F1 progeny
tetp3_F11	63	"tetrad spores"	Clonal	YAN463 x yGIL646 F1 progeny
tetp3_E11	63	"tetrad spores"	Clonal	YAN463 x yGIL646 F1 progeny
tetp3_D12	64	"tetrad spores"	Clonal	YAN463 x yGIL646 F1 progeny
tetp3_C12	64	"tetrad spores"	Clonal	YAN463 x yGIL646 F1 progeny
tetp3_B12	64	"tetrad spores"	Clonal	YAN463 x yGIL646 F1 progeny
tetp3_A12	64	"tetrad spores"	Clonal	YAN463 x yGIL646 F1 progeny
tetp3_H12	65	"tetrad spores"	Clonal	YAN463 x yGIL646 F1 progeny
tetp3_G12	65	"tetrad spores"	Clonal	YAN463 x yGIL646 F1 progeny
tetp3_F12	65	"tetrad spores"	Clonal	YAN463 x yGIL646 F1 progeny
pool_1	n/a	"selected spores"	Mixed (pooled)	YAN463 x yGIL646 F1 progeny. Pool of populations that were haploid at end of 500 generations of evolution and Trp Auxotrophic/Lys Auxotrophic
pool_2	n/a	"selected spores"	Mixed (pooled)	YAN463 x yGIL646 F1 progeny. Pool of populations that were haploid at end of 500 generations of evolution and Trp Prototrophic/Lys Auxotrophic
pool_3	n/a	"selected spores"	Mixed (pooled)	YAN463 x yGIL646 F1 progeny. Pool of populations that were haploid at end of 500 generations of evolution and Trp Auxotrophic/Lys Prototrophic
pool_4	n/a	"selected spores"	Mixed (pooled)	YAN463 x yGIL646 F1 progeny. Pool of populations that were haploid at end of 500 generations of evolution and Trp Prototrophic/Lys Prototrophic
pool_9	n/a	"selected spores"	Mixed (pooled)	YAN463 x yGIL646 F1 progeny. Pool of populations that were diploid by end of 500 generations of evolution and Trp Auxotrophic/Lys Auxotrophic
pool_10	n/a	"selected spores"	Mixed (pooled)	YAN463 x yGIL646 F1 progeny. Pool of populations that were diploid by end of 500 generations of evolution and Trp Prototrophic/Lys Auxotrophic
pool_11	n/a	"selected spores"	Mixed (pooled)	YAN463 x yGIL646 F1 progeny. Pool of populations that were diploid by end of 500 generations of evolution and Trp Auxotrophic/Lys Prototrophic
pool_12	n/a	"selected spores"	Mixed (pooled)	YAN463 x yGIL646 F1 progeny. Pool of populations that were diploid by end of 500 generations of evolution and Trp Prototrophic/Lys Prototrophic
YAN_463	n/a	parent	Clonal	YAN463
yGIL646	n/a	parent	Clonal	yGIL646
